# Supplementary material for: Novel high-performance Ga2Te3 anodes for Li-ion batteries
Source: Royal Society of Chemistry journal article supplement (doi:10.1039/d1ta05336a), 2021-01-01
Supplement: d1ta05336a1.pdf [file d1ta05336a1.pdf]

**Supplementary Information for**

# Novel high-performance Ga<sub>2</sub>Te<sub>3</sub> anode for Li-ion batteries

*Young-Han Lee,<sup>a,c</sup> Yoon Hwa,<sup>\*b</sup> and Cheol-Min Park<sup>\*a,c</sup>*

<sup>a</sup> School of Materials Science and Engineering, Kumoh National Institute of Technology, 61  
Daehak-ro, Gumi, Gyeongbuk 39177, Republic of Korea

<sup>b</sup> School of Electrical, Computer, and Energy Engineering, Arizona State University, Tempe,  
AZ, 85281, USA

<sup>c</sup> Department of Energy Engineering Convergence, Kumoh National Institute of Technology,  
Gumi, Gyeongbuk 39177, Republic of Korea

---

**\*Corresponding authors.**

Tel.: +82 (054) 478-7746. Fax: +82 (054) 478-7769. E-mail: [cmpark@kumoh.ac.kr](mailto:cmpark@kumoh.ac.kr) (C.-M. Park)

Tel.: +1 (602) 543-3490. E-mail: [yoona.hwa@asu.edu](mailto:yoona.hwa@asu.edu) (Y. Hwa)

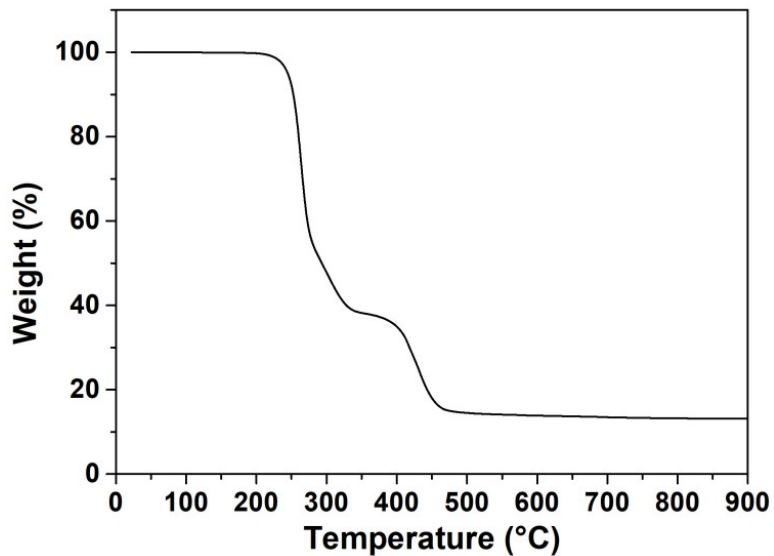

**Figure S1.** TGA data of pyrolyzed PVC, recorded between the ambient temperature and 900 °C.

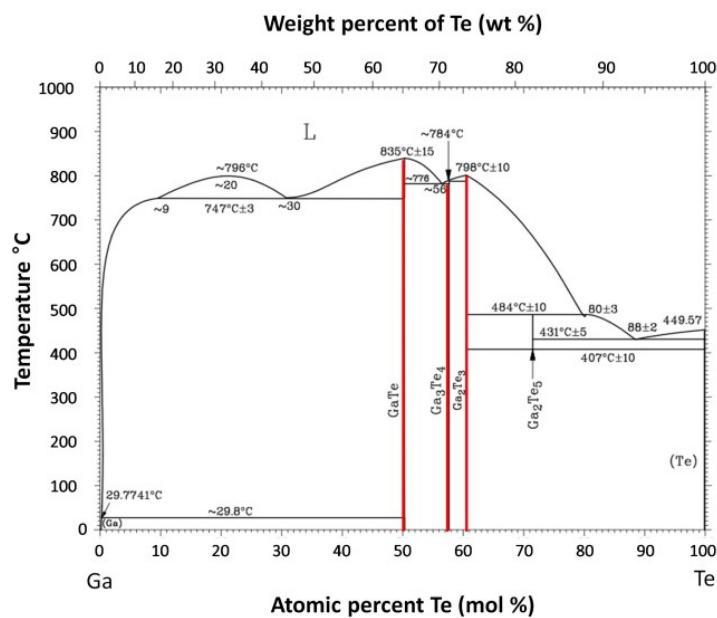

**Figure S2.** Binary phase diagram of Ga and Te, depicting thermodynamically stable GaTe, Ga<sub>3</sub>Te<sub>4</sub>, and Ga<sub>2</sub>Te<sub>3</sub> phases at ambient temperature.

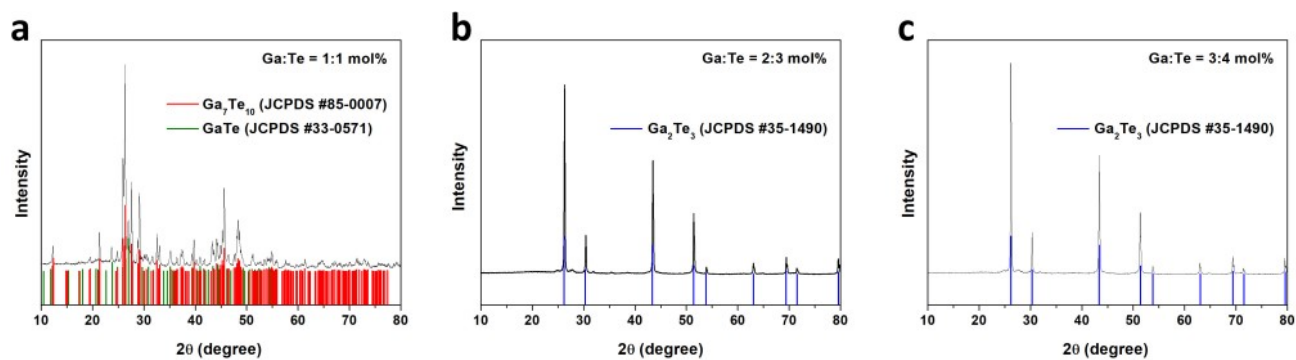

**Figure S3.** Synthesis of binary Ga-Te compounds and XRD results after heat-treatment of Ga and Te with different stoichiometric ratios (mol%): (a) 1:1; (b) 2:3; (c) 3:4.

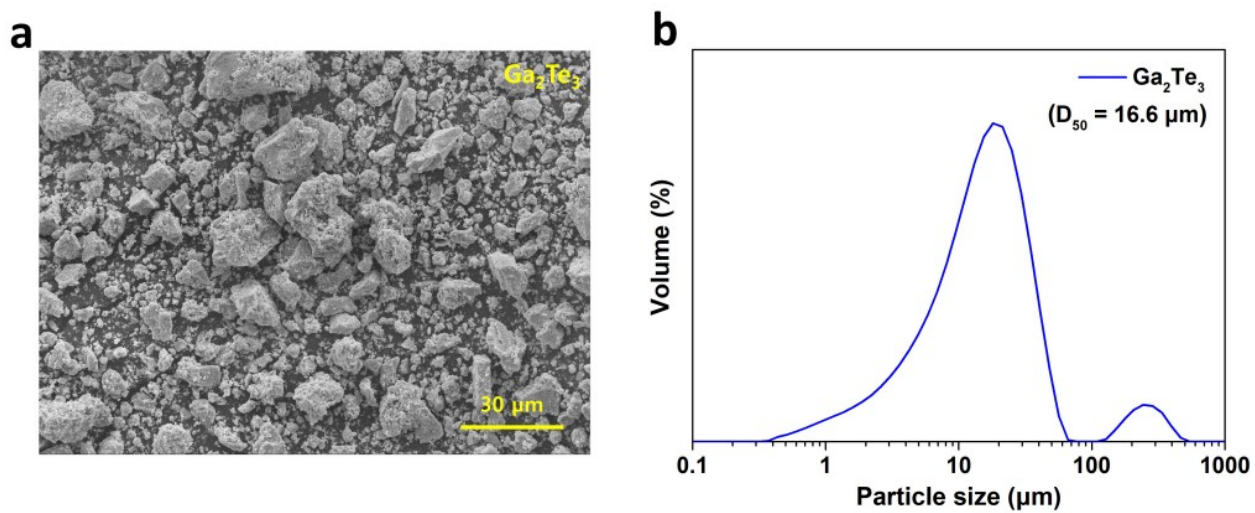

**Figure S4.** Characterization of synthesized  $\text{Ga}_2\text{Te}_3$  powder: (a) SEM image; (b) result of particle size analysis.

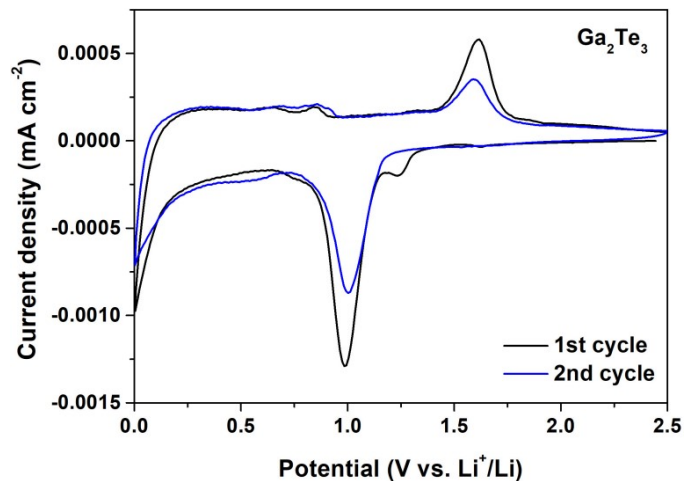

**Figure S5.** CV results for the first and second cycles of  $\text{Ga}_2\text{Te}_3$  electrode for LIBs (voltage range: 0–2.5 V).

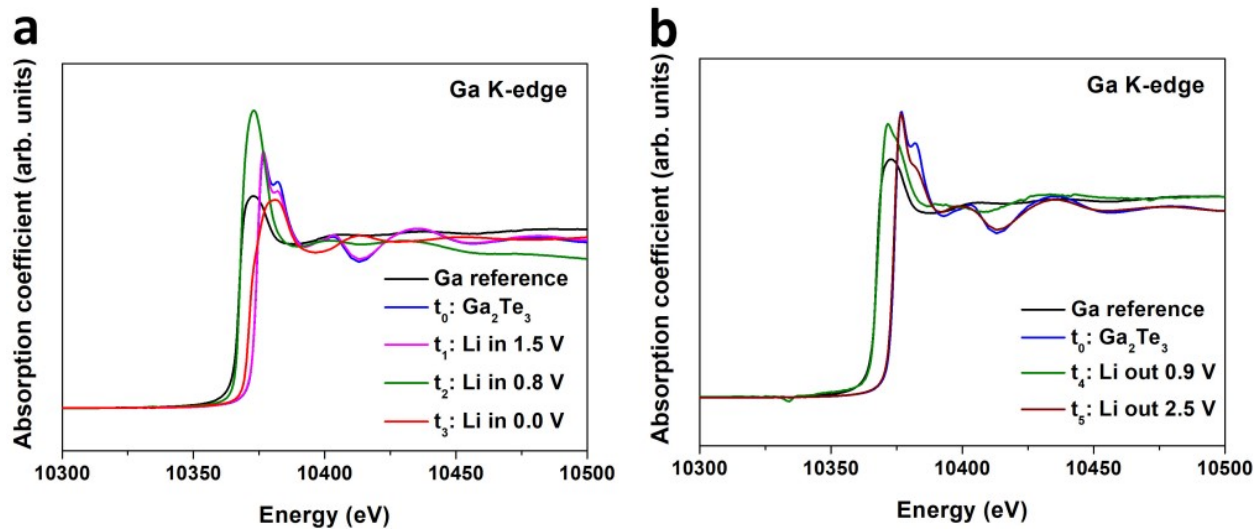

**Figure S6.** Reaction mechanism of  $\text{Ga}_2\text{Te}_3$  anode with Li. Ga-K edge XANES spectra of  $\text{Ga}_2\text{Te}_3$  anode during the first (a) lithiation and (b) delithiation processes.

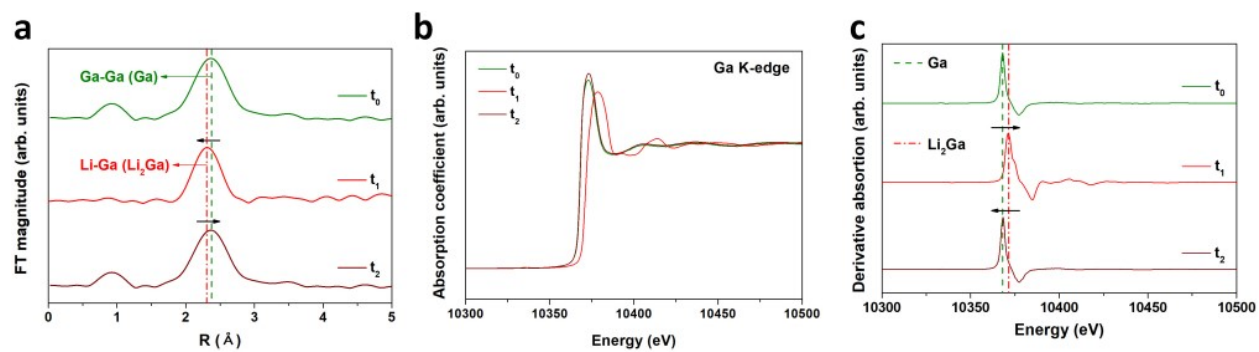

**Figure S7.** Reaction mechanism of Ga anode with Li. (a) *Ex situ* EXAFS results. (b) XANES spectra and (c) derivative XANES patterns of Ga anode collected at the selected potentials ( $t_0$ – $t_2$ ).

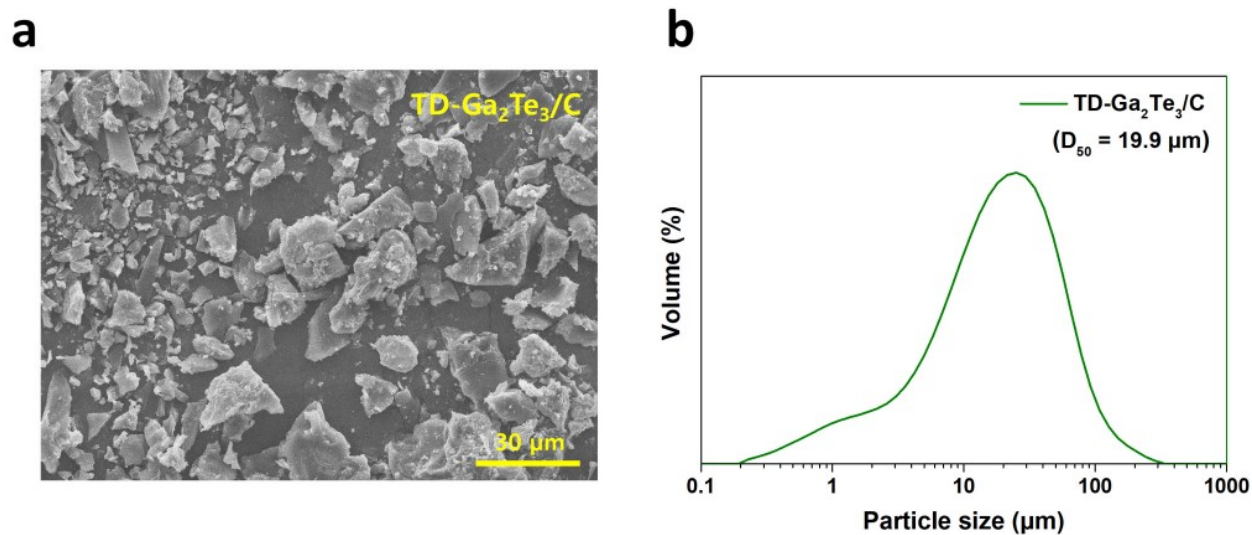

**Figure S8.** Characterization of synthesized TD- $\text{Ga}_2\text{Te}_3/\text{C}$  powder. (a) SEM image. (b) Result of particle size analysis.

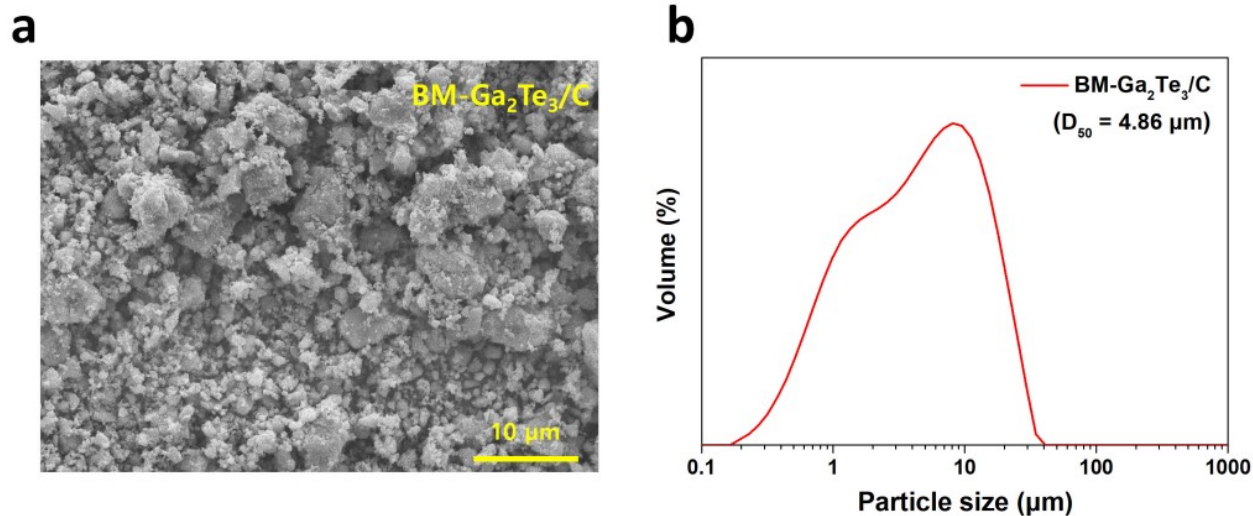

**Figure S9.** Characterization of synthesized BM-Ga<sub>2</sub>Te<sub>3</sub>/C powder. (a) SEM image. (b) Result of particle size analysis.

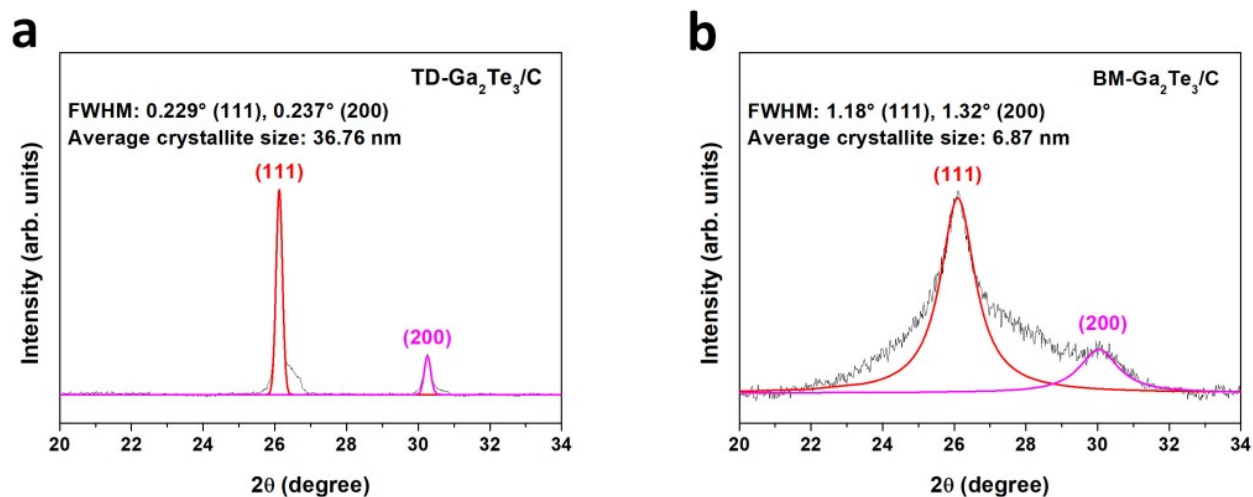

**Figure S10.** Crystallite size using XRD patterns of synthesized TD-Ga<sub>2</sub>Te<sub>3</sub>/C and BM-Ga<sub>2</sub>Te<sub>3</sub>/C composites. (a) Average crystallite size of Ga<sub>2</sub>Te<sub>3</sub> in TD-Ga<sub>2</sub>Te<sub>3</sub>/C calculated using (111) and (200) planes of the XRD result. (b) Average crystallite size of Ga<sub>2</sub>Te<sub>3</sub> in BM-Ga<sub>2</sub>Te<sub>3</sub>/C calculated using (111) and (200) planes of the XRD result.

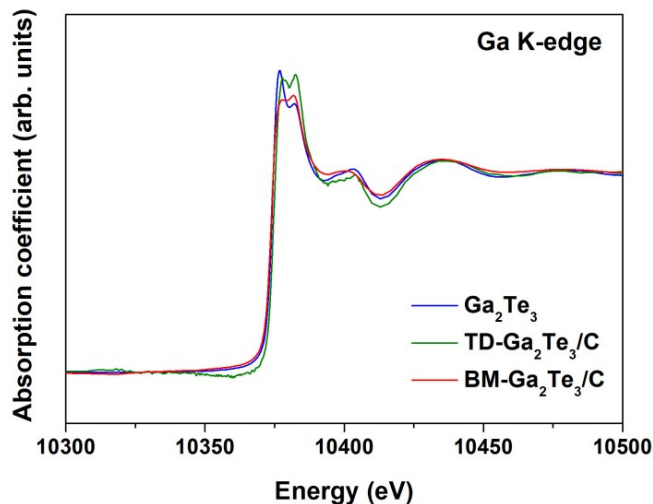

**Figure S11.** Synthesis of  $\text{TD-Ga}_2\text{Te}_3/\text{C}$  and  $\text{BM-Ga}_2\text{Te}_3/\text{C}$  composites. Ga-K edge XANES spectra for  $\text{Ga}_2\text{Te}_3$ ,  $\text{TD-Ga}_2\text{Te}_3/\text{C}$ , and  $\text{BM-Ga}_2\text{Te}_3/\text{C}$  composites.

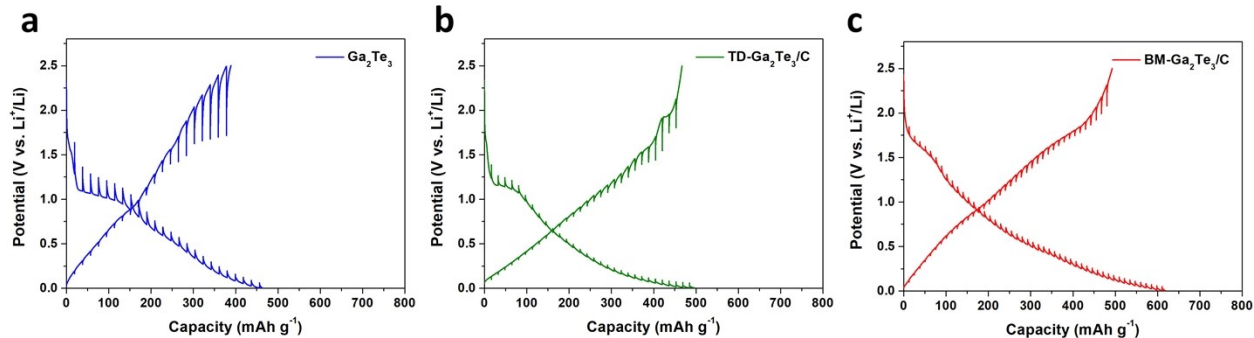

**Figure S12.** GITT plots of the  $\text{Ga}_2\text{Te}_3$ ,  $\text{TD-Ga}_2\text{Te}_3/\text{C}$ , and  $\text{BM-Ga}_2\text{Te}_3/\text{C}$  composite anodes after 2 cycle at  $100 \text{ mA g}^{-1}$  (voltage range: 0–2.5 V). (a) GITT plot of the  $\text{Ga}_2\text{Te}_3$  anode. (b) GITT plot of the  $\text{TD-Ga}_2\text{Te}_3/\text{C}$  anode. (c) GITT plot of the  $\text{BM-Ga}_2\text{Te}_3/\text{C}$  anode.



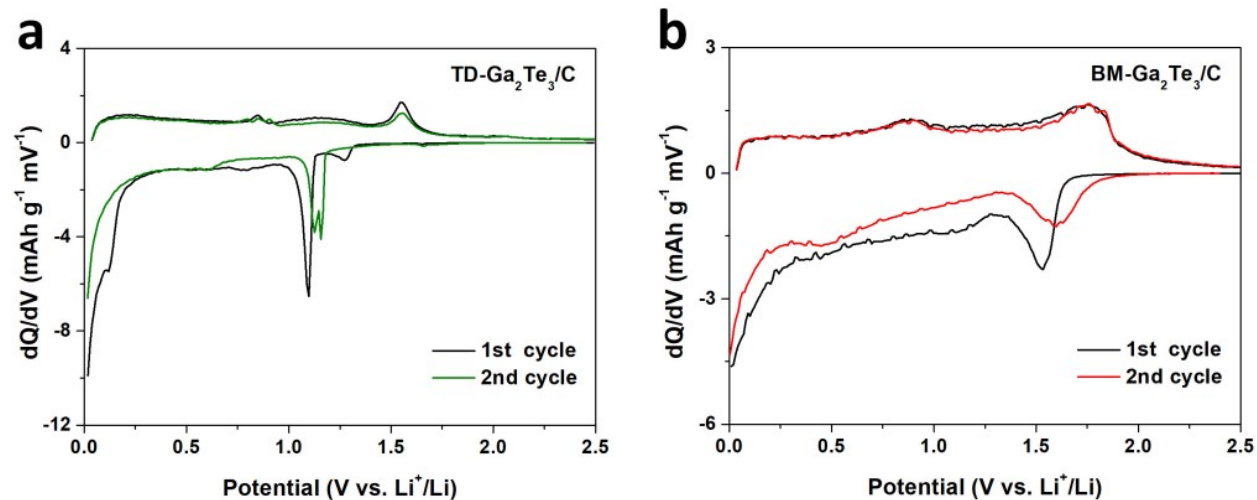

**Figure S13.** Differential capacity plots (DCPs) for TD-Ga<sub>2</sub>Te<sub>3</sub>/C and BM-Ga<sub>2</sub>Te<sub>3</sub>/C. (a) First and second DCPs of TD-Ga<sub>2</sub>Te<sub>3</sub>/C (voltage range: 0–2.5 V). (b) First and second DCPs of BM-Ga<sub>2</sub>Te<sub>3</sub>/C (voltage range: 0–2.5 V).

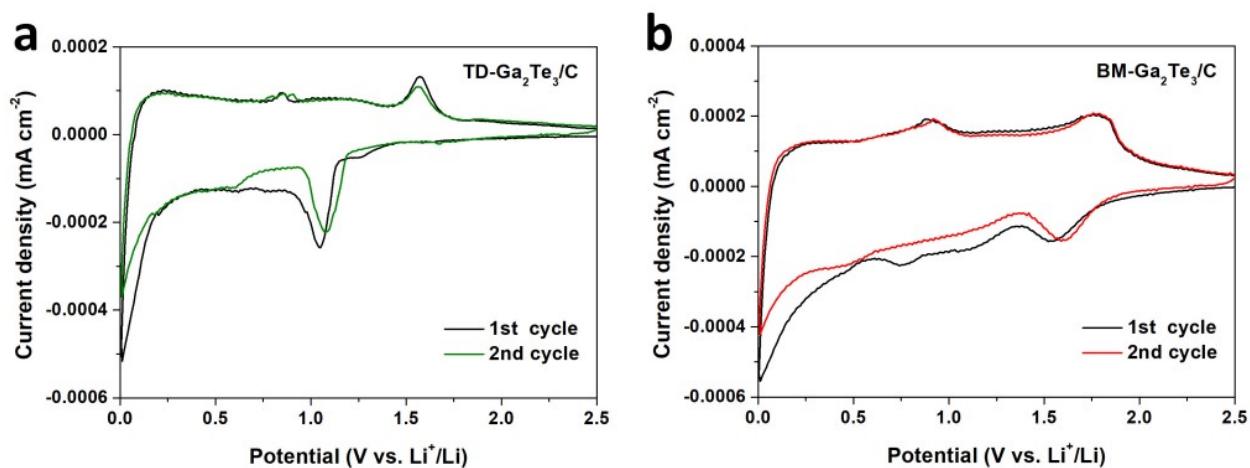

**Figure S14.** Cyclic voltammetry (CV) results for TD-Ga<sub>2</sub>Te<sub>3</sub>/C and BM-Ga<sub>2</sub>Te<sub>3</sub>/C. (a) First and second CV plots of TD-Ga<sub>2</sub>Te<sub>3</sub>/C (voltage range: 0–2.5 V). (b) First and second CV plots of BM-Ga<sub>2</sub>Te<sub>3</sub>/C (voltage range: 0–2.5 V).



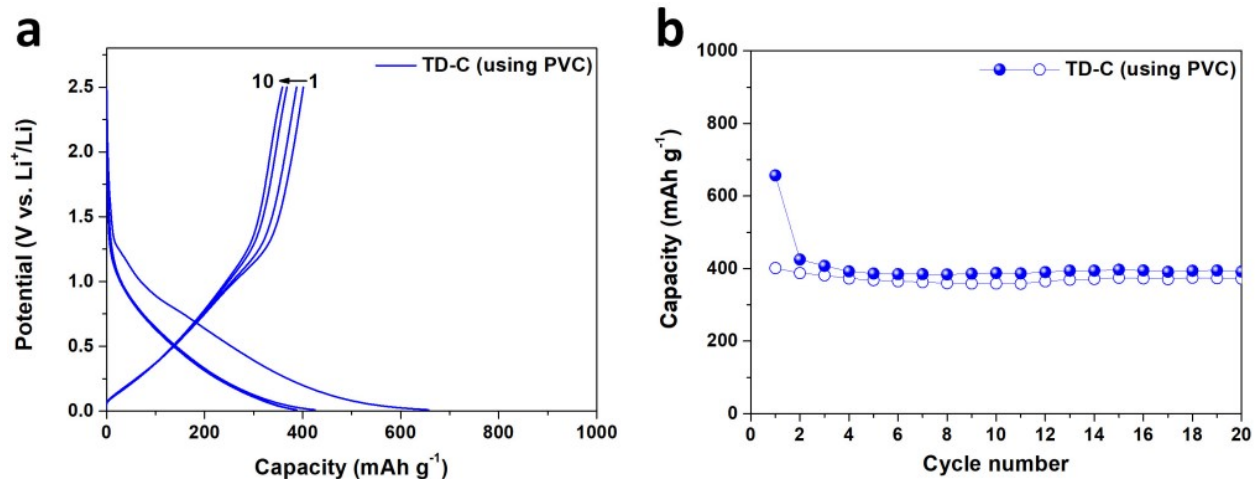

**Figure S15.** Electrochemical performance of thermally decomposed amorphous carbon produced by thermal decomposition (TD). (a) Voltage profile. (b) Cycling stability (current density:  $100 \text{ mA g}^{-1}$ ).

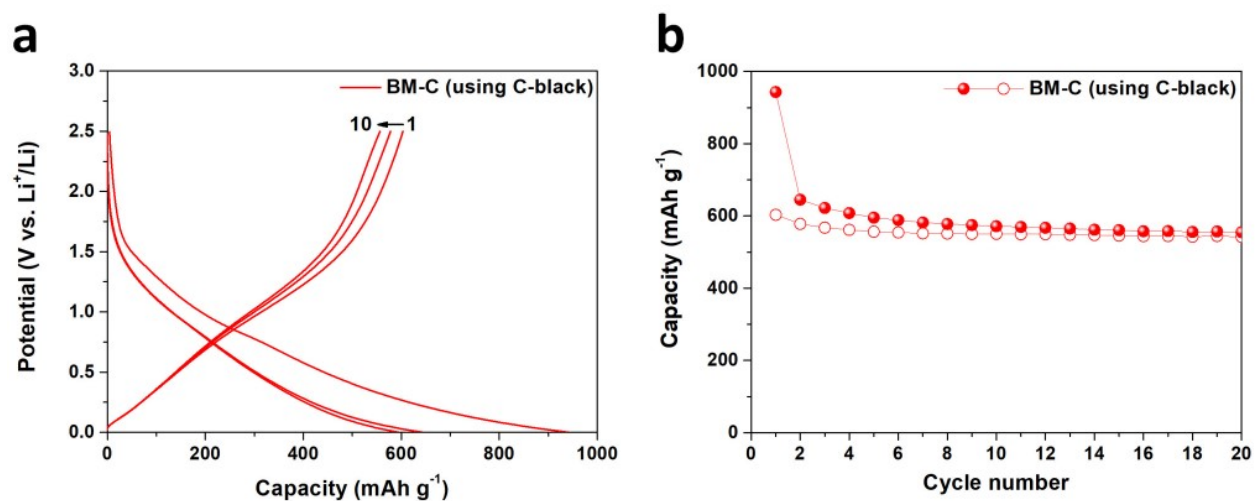

**Figure S16.** Electrochemical performance of ball milling (BM) treated amorphous carbon. (a) Voltage profile. (b) Cycling stability (current density:  $100 \text{ mA g}^{-1}$ ).

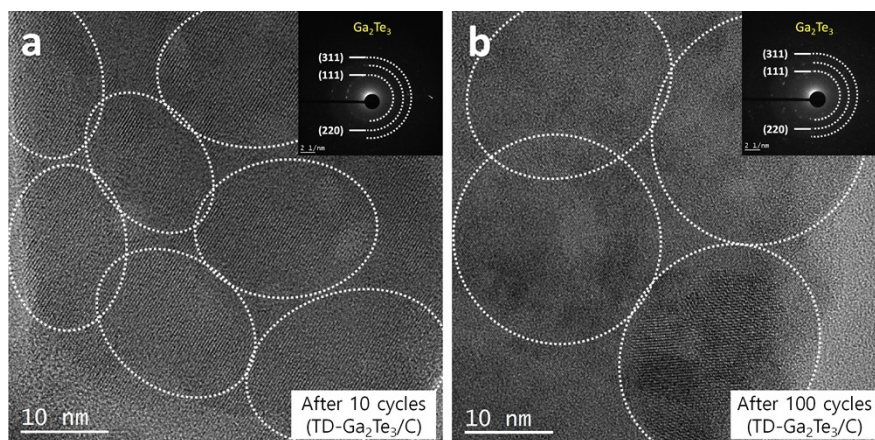

**Figure S17.** HRTEM images of TD-Ga<sub>2</sub>Te<sub>3</sub>/C composite anode after galvanostatic cycling. *Ex situ* HRTEM images of TD-Ga<sub>2</sub>Te<sub>3</sub>/C composite with SAEDs after (a) 10 and (b) 100 galvanostatic cycles.

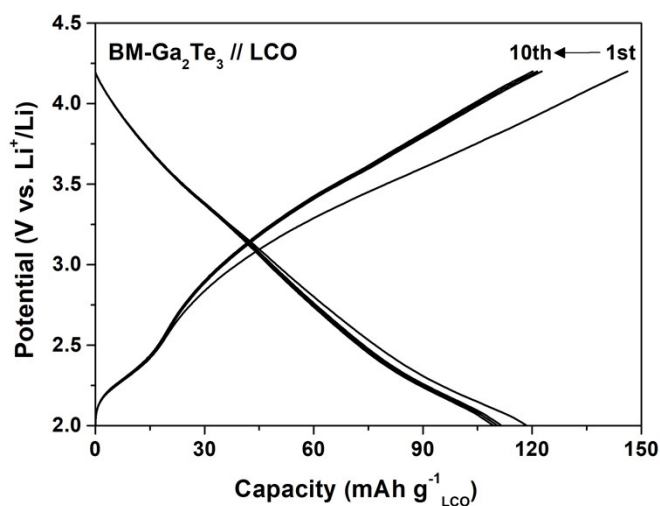

**Figure S18.** Electrochemical performance of full cell comprising of BM-Ga<sub>2</sub>Te<sub>3</sub>/C anode and LCO cathode. Voltage profile of the full cell with BM-Ga<sub>2</sub>Te<sub>3</sub>/C anode and LCO cathode within the potential range of 2.0–4.2 V at 0.1 C (=14 mA g<sup>-1</sup>).

**Supplementary Table 1:** Comparison of electrochemical performances of various Ga-based anodes for LIBs.

| Material                                                 | Cycling performance                     |                                                                   | Rate capability                         |                     | Ref. |
|----------------------------------------------------------|-----------------------------------------|-------------------------------------------------------------------|-----------------------------------------|---------------------|------|
|                                                          | Current density<br>(A g <sup>-1</sup> ) | Reversible capacity<br>after Xth cycles<br>(mAh g <sup>-1</sup> ) | Current density<br>(A g <sup>-1</sup> ) | Reversible capacity |      |
| Ga-C NPs                                                 | 0.1                                     | 400 (X=100)                                                       |                                         |                     | 14   |
| Ga-In alloy                                              | 2.1                                     | 400 (X=500)                                                       | 3.5                                     | 400                 | 41   |
| CuGa <sub>2</sub>                                        | 0.2                                     | 550 (X=60)                                                        | 2                                       | 500                 | 42   |
| GaN NWs/graphite                                         | 0.1                                     | 486 (X=400)                                                       | 10                                      | 75                  | 43   |
| Ga <sub>2</sub> O <sub>3</sub> NRs                       | 0.1                                     | 300 (X=50)                                                        | 1                                       | 243                 | 44   |
| Ga <sub>2</sub> O <sub>3</sub> /rGO                      | 0.05                                    | 770 (X=40)                                                        | 1                                       | 320                 | 45   |
| Ga <sub>2</sub> O <sub>3</sub> @C NPs                    | 0.5                                     | 720 (X=200)                                                       | 2                                       | 271                 | 46   |
| β-Ga <sub>2</sub> O <sub>3</sub> @G/C                    | 0.2                                     | 517.9 (X=100)                                                     | 0.5                                     | 376.7               | 47   |
| α-Ga <sub>2</sub> O <sub>3</sub> @C@G                    | 0.1                                     | 447.3 (X=50)                                                      | 0.5                                     | 334.9               | 48   |
| Ga <sub>2</sub> S <sub>3</sub>                           | 0.1                                     | 400 (X=20)                                                        | 1                                       | 550                 | 49   |
| SWCNT-GaS <sub>x</sub>                                   | 0.12                                    | 575 (X=100)                                                       | 0.6                                     | 514                 | 50   |
| GaS NS/SWCNT                                             | 1                                       | 300 (X=100)                                                       | 2                                       | 530                 | 51   |
| GaSe NS/SWCNT                                            | 0.1                                     | 713 (X=5)                                                         | 2                                       | 413                 | 51   |
| GaSe                                                     | 0.1                                     | 760 (X=50)                                                        | 1                                       | 600                 | 52   |
| Ga <sub>2</sub> Se <sub>3</sub> thin film                | 0.07                                    | 569.9 (X=100)                                                     | 0.7                                     | 340                 | 53   |
| <b>BM-Ga<sub>2</sub>Te<sub>3</sub>/C<br/>(This work)</b> | <b>0.1</b>                              | <b>574 (X=500)</b>                                                | <b>0.6</b>                              | <b>528</b>          | -    |
